# Supplementary material for: Altered structural and effective connectivity in anorexia and bulimia nervosa in circuits that regulate energy and reward homeostasis
Source: PubMed Central journal article supplement (PMC5314116; doi:10.1038/tp.2016.199), 2016-11-01
Supplement: tp2016199x1.pdf [file tp2016199x1.pdf]

## Supplemental Material

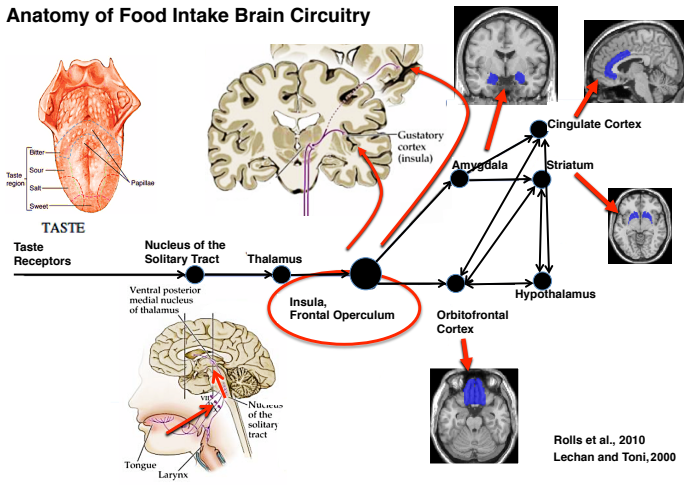

**Supplemental Figure 1.** Anatomical connections between taste and food reward circuitry based on Rolls et al. 2010 and Lechan and Toni 2000.

Rolls ET. The affective and cognitive processing of touch, oral texture, and temperature in the brain. *Neurosci Biobehav Rev.* 2010;34(2):237-45. Epub 2008/05/13. doi: S0149-7634(08)00046-8 [pii] 10.1016/j.neubiorev.2008.03.010. PubMed PMID: 18468687.

Lechan RM, Toni R. Functional Anatomy of the Hypothalamus and Pituitary. In: De Groot LJ, Beck-Peccoz P, Chrousos G, Dungan K, Grossman A, Hershman JM, et al., editors. *Endotext*. South Dartmouth (MA)2000.

### Movement Parameters:

All subjects' movements of the head during fMRI were within the 1-voxel threshold and no subject was removed. Movement parameters were included in the preprocessing analysis. There were no statistical differences between movement parameters between groups (Supplemental Table 1) and no subject exceeded movement of one voxel (3mm).

| Movement       | HC       |         | AN       |         | BN       |         | F     | p     |
|----------------|----------|---------|----------|---------|----------|---------|-------|-------|
|                | M        | SD      | M        | SD      | M        | SD      |       |       |
| X translation  | -0.17776 | 0.67373 | -0.03708 | 0.43703 | 0.08163  | 0.63373 | 1.185 | 0.312 |
| Y translation  | 0.31773  | 0.39516 | 0.49457  | 0.31240 | 0.47708  | 0.29853 | 2.086 | 0.132 |
| Z translation  | 0.10157  | 1.12886 | -0.43239 | 1.15919 | -0.20124 | 1.17117 | 1.378 | 0.259 |
| Roll rotation  | 0.00374  | 0.02032 | 0.01046  | 0.02221 | 0.00381  | 0.01762 | 0.905 | 0.409 |
| Pitch rotation | -0.00397 | 0.01644 | 0.00109  | 0.01226 | -0.00196 | 0.01176 | 0.875 | 0.421 |
| Yaw rotation   | -0.00002 | 0.00641 | 0.00030  | 0.00613 | 0.00091  | 0.00867 | 0.108 | 0.898 |

Supplemental Table 1. Movement parameters across groups.

## fMRI Main Effects and Comparison Between Groups

fMRI contrast main effect data for the contrast Receiving Sucrose vs. Receiving No Solution per ROI were also extracted and compared across groups. The data were non-normally distributed, therefore rank transformed and analyzed by group including the same cofactors as in the analysis of connectivity strength. The multivariate Wilks' Lambda for group effect was 0.390,  $p < 0.986$ ; individual group effects by region were non significant.

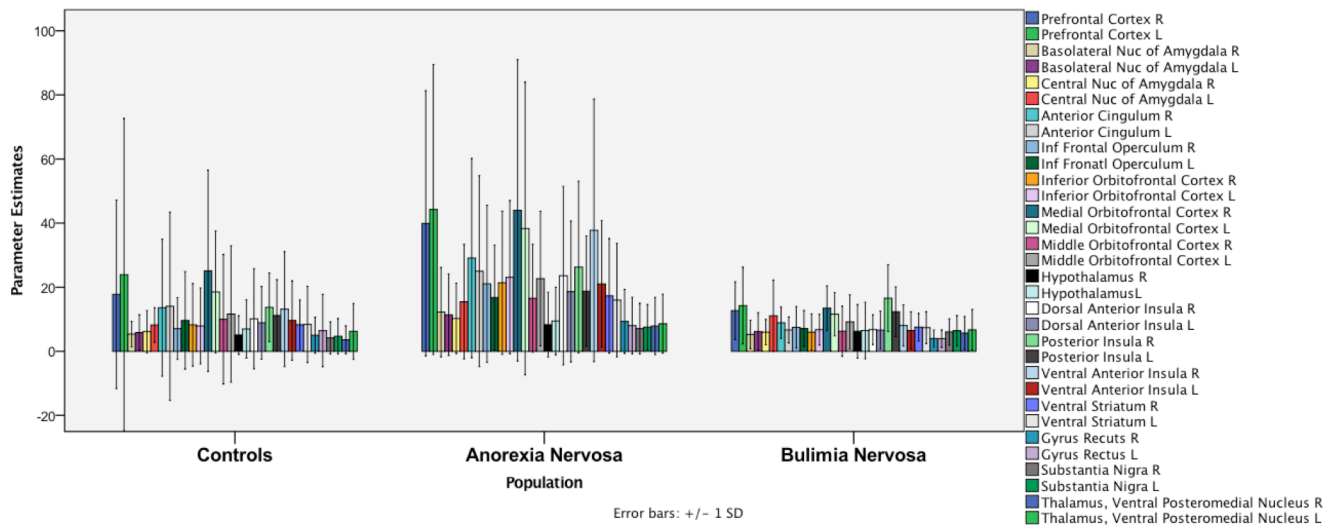

**Supplemental Figure 2.** Graphical representation of main effect parameter estimates by group and region of interest for the contrast receiving sucrose vs. receiving no solution.

|                                               | With Co Factors |         |           |        |            |        | No Cofactors                                                       |        |        |        | Nonparametric Test  |                    |
|-----------------------------------------------|-----------------|---------|-----------|--------|------------|--------|--------------------------------------------------------------------|--------|--------|--------|---------------------|--------------------|
|                                               | CW (n=26)       |         | AN (n=26) |        | BN (n= 25) |        | MANOVA                                                             |        | MANOVA |        | Kruskal-Wallis Test |                    |
|                                               | Mean            | SD      | Mean      | SD     | Mean       | SD     | F                                                                  | p      | F      | p      | Test Statistic      | Sig (2-sided test) |
| BLA - ACC, L                                  | 0.00            | 0.00    | 9.69      | 49.39  | 0.00       | 0.00   | 1.787                                                              | 0.175  | 0.980  | 0.380  | 1.962               | 0.375              |
| BLA - Hypothalamus, L                         | 18.44           | 86.62   | 2.17      | 9.94   | 0.00       | 0.00   | 0.548                                                              | 0.580  | 1.019  | 0.366  | 8.135               | 0.017              |
| BLA - SN, L                                   | 13.56           | 62.13   | 0.72      | 2.28   | 0.66       | 3.29   | 0.434                                                              | 0.650  | 1.089  | 0.342  | 3.938               | 0.140              |
| BLA - Ventral Striatum, L                     | 0.39            | 1.48    | 27.90     | 142.27 | 0.00       | 0.00   | 1.798                                                              | 0.173  | 0.966  | 0.385  | 9.021               | 0.011              |
| BLA - ACC, R                                  | 0.01            | 0.02    | 0.01      | 0.03   | 0.00       | 0.01   | 3.516                                                              | 0.035  | 1.430  | 0.246  | 2.828               | 0.243              |
| BLA - Hypothalamus, R                         | 0.42            | 1.57    | 1.82      | 5.16   | 0.15       | 0.73   | 2.427                                                              | 0.096  | 2.066  | 0.134  | 1.180               | 0.554              |
| BLA - SN, R                                   | 0.40            | 1.14    | 0.94      | 2.89   | 0.28       | 0.97   | 1.839                                                              | 0.166  | 0.891  | 0.414  | 0.273               | 0.872              |
| BLA - Ventral Striatum, R                     | 0.38            | 0.50    | 0.56      | 1.41   | 0.05       | 0.14   | 4.880                                                              | 0.010  | 2.221  | 0.116  | 10.075              | 0.006              |
| CNA - ACC, L                                  | 0.09            | 0.24    | 0.04      | 0.12   | 0.01       | 0.03   | 0.773                                                              | 0.465  | 1.820  | 0.169  | 4.428               | 0.109              |
| CNA - Hypothalamus, L                         | 254.84          | 1238.30 | 4.64      | 14.33  | 3.38       | 16.07  | 0.388                                                              | 0.680  | 1.045  | 0.357  | 14.058              | 0.001              |
| CNA - SN, L                                   | 320.62          | 724.54  | 115.72    | 468.01 | 45.97      | 183.56 | 1.373                                                              | 0.161  | 1.995  | 0.143  | 18.701              | <0.001             |
| CNA - Ventral Striatum, L                     | 28.78           | 116.12  | 3.96      | 12.66  | 0.02       | 0.09   | 0.620                                                              | 0.541  | 1.358  | 0.263  | 28.430              | <0.001             |
| CNA - ACC, R                                  | 0.07            | 0.26    | 0.02      | 0.07   | 0.02       | 0.09   | 0.799                                                              | 0.454  | 0.746  | 0.478  | 4.081               | 0.130              |
| CNA - Hypothalamus, R                         | 3.28            | 3.68    | 1.43      | 3.33   | 0.30       | 1.03   | 5.505                                                              | 0.006  | 6.697  | 0.002  | 16.158              | <0.001             |
| CNA - SN, R                                   | 1.92            | 3.52    | 2.60      | 5.48   | 0.71       | 2.91   | 2.090                                                              | 0.131  | 1.364  | 0.262  | 4.139               | 0.126              |
| CNA - Ventral Striatum, R                     | 1.28            | 1.44    | 2.77      | 9.52   | 0.16       | 0.35   | 3.614                                                              | 0.032  | 1.403  | 0.252  | 16.284              | <0.001             |
| Inferior OFC - BA10, L                        | 13.84           | 2.49    | 14.95     | 1.22   | 15.18      | 0.06   | 1.357                                                              | 0.264  | 5.064  | 0.009  | 23.293              | <0.001             |
| Inferior OFC - Hypothalamus, L                | 70.29           | 137.57  | 66.70     | 156.65 | 40.84      | 72.12  | 0.187                                                              | 0.830  | 0.399  | 0.672  | 3.085               | 0.214              |
| Inferior OFC - Ventral Striatum, L            | 81.06           | 32.01   | 104.04    | 27.50  | 111.90     | 16.50  | 3.972                                                              | 0.023  | 9.560  | <0.001 | 18.815              | <0.001             |
| Inferior OFC - BA10, R                        | 11.00           | 3.74    | 12.87     | 3.68   | 13.41      | 3.13   | 0.863                                                              | 0.426  | 3.292  | 0.043  | 6.637               | 0.036              |
| Inferior OFC - Hypothalamus, R                | 26.63           | 46.84   | 74.37     | 178.42 | 35.90      | 94.48  | 1.717                                                              | 0.187  | 1.154  | 0.321  | 0.425               | 0.809              |
| Inferior OFC - Ventral Striatum, R            | 58.96           | 41.67   | 89.66     | 38.45  | 96.14      | 44.57  | 2.266                                                              | 0.111  | 5.865  | 0.004  | 10.602              | 0.005              |
| Dorsal Anterior Insula - BA10, L              | 12.47           | 10.41   | 27.03     | 6.30   | 24.71      | 8.77   | 7.653                                                              | 0.001  | 21.140 | <0.001 | 22.775              | <0.001             |
| Dorsal Anterior Insula - BLA, L               | 0.06            | 0.17    | 0.02      | 0.07   | 0.00       | 0.00   | 1.565                                                              | 0.216  | 2.361  | 0.101  | 5.777               | 0.056              |
| Dorsal Anterior Insula - CNA, L               | 1.69            | 3.57    | 0.32      | 1.01   | 0.04       | 0.12   | 2.156                                                              | 0.123  | 4.267  | 0.018  | 24.974              | <0.001             |
| Dorsal Anterior Insula - Inferior OFC, L      | 32.26           | 0.00    | 32.26     | 0.00   | 30.96      | 6.45   | 1.152                                                              | 0.322  | 1.045  | 0.357  | 4.304               | 0.116              |
| Dorsal Anterior Insula - Medial OFC, L        | 1.23            | 4.23    | 1.35      | 5.13   | 2.03       | 9.07   | 0.081                                                              | 0.922  | 0.113  | 0.893  | 6.930               | 0.031              |
| Dorsal Anterior Insula - Middle OFC, L        | 15.46           | 18.14   | 42.12     | 20.25  | 37.04      | 20.14  | 9.982                                                              | <0.001 | 13.621 | <0.001 | 16.878              | <0.001             |
| Dorsal Anterior Insula - Rectus, L            | 0.59            | 1.54    | 0.60      | 1.31   | 0.84       | 2.56   | 0.239                                                              | 0.788  | 0.147  | 0.863  | 1.686               | 0.430              |
| Dorsal Anterior Insula - Ventral Striatum, L  | 122.73          | 77.23   | 195.63    | 56.54  | 199.77     | 55.61  | 5.026                                                              | 0.009  | 11.823 | <0.001 | 15.617              | <0.001             |
| Dorsal Anterior Insula - BA10, R              | 17.36           | 5.90    | 20.95     | 7.16   | 21.15      | 6.11   | 3.701                                                              | 0.030  | 2.861  | 0.064  | 10.187              | 0.006              |
| Dorsal Anterior Insula - BLA, R               | 0.14            | 0.24    | 0.03      | 0.07   | 0.01       | 0.02   | 3.541                                                              | 0.034  | 6.568  | 0.002  | 13.647              | 0.001              |
| Dorsal Anterior Insula - CNA, R               | 1.60            | 4.27    | 0.07      | 0.11   | 0.01       | 0.03   | 1.315                                                              | 0.275  | 3.410  | 0.038  | 34.686              | <0.001             |
| Dorsal Anterior Insula - Inferior OFC, R      | 26.80           | 0.00    | 26.80     | 0.00   | 26.80      | 0.00   | 100% of connectivity probability between regions and across groups |        |        |        |                     |                    |
| Dorsal Anterior Insula - Medial OFC, R        | 7.09            | 15.15   | 16.79     | 19.28  | 10.51      | 16.98  | 1.775                                                              | 0.177  | 2.119  | 0.127  | 9.682               | 0.008              |
| Dorsal Anterior Insula - Middle OFC, R        | 30.01           | 15.82   | 37.01     | 17.49  | 41.57      | 13.69  | 3.042                                                              | 0.054  | 3.487  | 0.036  | 9.894               | 0.007              |
| Dorsal Anterior Insula - Rectus, R            | 2.81            | 8.44    | 10.53     | 14.34  | 6.73       | 10.16  | 4.199                                                              | 0.019  | 3.044  | 0.054  | 18.035              | <0.001             |
| Dorsal Anterior Insula - Ventral Striatum, R  | 152.36          | 55.20   | 158.56    | 57.83  | 160.17     | 60.72  | 4.021                                                              | 0.979  | 0.130  | 0.878  | 0.656               | 0.721              |
| Posterior Insula - BA10, L                    | 1.76            | 3.90    | 6.96      | 5.94   | 7.59       | 7.30   | 4.700                                                              | 0.012  | 7.677  | 0.001  | 23.827              | <0.001             |
| Posterior Insula - BLA, L                     | 0.10            | 0.34    | 0.01      | 0.02   | 0.00       | 0.01   | 0.878                                                              | 0.420  | 2.170  | 0.121  | 2.997               | 0.223              |
| Posterior Insula - CNA, L                     | 4.58            | 17.51   | 6.39      | 22.22  | 0.02       | 0.06   | 1.727                                                              | 0.185  | 1.011  | 0.369  | 23.513              | <0.001             |
| Posterior Insula - Inferior OFC, L            | 5.47            | 6.53    | 10.24     | 7.49   | 9.06       | 7.71   | 1.120                                                              | 0.332  | 3.048  | 0.053  | 6.943               | 0.031              |
| Posterior Insula - Medial OFC, L              | 0.10            | 0.21    | 0.47      | 1.27   | 0.11       | 0.45   | 1.617                                                              | 0.206  | 1.806  | 0.171  | 8.664               | 0.013              |
| Posterior Insula - Middle OFC, L              | 3.65            | 9.47    | 13.20     | 12.61  | 11.58      | 12.83  | 5.045                                                              | 0.009  | 4.924  | 0.010  | 24.632              | <0.001             |
| Posterior Insula - Rectus, L                  | 0.07            | 0.10    | 0.95      | 2.71   | 0.07       | 0.12   | 2.323                                                              | 0.105  | 2.691  | 0.074  | 7.601               | 0.022              |
| Posterior Insula - Ventral Striatum, L        | 57.61           | 61.99   | 142.66    | 46.59  | 130.56     | 44.42  | 13.418                                                             | <0.001 | 20.525 | <0.001 | 24.583              | <0.001             |
| Posterior Insula - BA10, R                    | 9.07            | 6.29    | 11.73     | 6.63   | 11.63      | 7.13   | 1.147                                                              | 0.324  | 1.311  | 0.276  | 2.789               | 0.248              |
| Posterior Insula - BLA, R                     | 0.39            | 1.19    | 0.08      | 0.21   | 0.02       | 0.06   | 0.580                                                              | 0.562  | 2.050  | 0.136  | 9.846               | 0.007              |
| Posterior Insula - CNA, R                     | 2.15            | 4.69    | 0.85      | 1.82   | 0.08       | 0.18   | 0.769                                                              | 0.467  | 3.264  | 0.044  | 9.161               | 0.010              |
| Posterior Insula - Inferior OFC, R            | 16.59           | 5.49    | 15.90     | 6.51   | 15.37      | 6.65   | 0.241                                                              | 0.786  | 0.248  | 0.781  | 0.233               | 0.890              |
| Posterior Insula - Medial OFC, R              | 5.63            | 11.48   | 10.12     | 14.10  | 8.05       | 12.62  | 0.724                                                              | 0.488  | 0.803  | 0.452  | 5.269               | 0.072              |
| Posterior Insula - Middle OFC, R              | 21.59           | 12.12   | 21.77     | 15.47  | 27.64      | 14.84  | 1.268                                                              | 0.288  | 1.486  | 0.233  | 4.410               | 0.110              |
| Posterior Insula - Rectus, R                  | 5.23            | 9.97    | 8.86      | 12.96  | 8.77       | 10.67  | 0.396                                                              | 0.674  | 0.869  | 0.424  | 4.612               | 0.100              |
| Posterior Insula - Ventral Striatum, R        | 70.31           | 62.17   | 139.26    | 53.36  | 164.21     | 31.12  | 4.604                                                              | 0.013  | 23.512 | <0.001 | 29.665              | <0.001             |
| Ventral Anterior Insula - BA10, L             | 20.68           | 18.38   | 44.78     | 26.14  | 42.91      | 26.42  | 1.322                                                              | 0.273  | 8.137  | 0.001  | 13.768              | 0.001              |
| Ventral Anterior Insula - BLA, L              | 0.07            | 0.11    | 0.05      | 0.16   | 0.00       | 0.00   | 2.976                                                              | 0.057  | 2.695  | 0.074  | 9.078               | 0.011              |
| Ventral Anterior Insula - CNA, L              | 0.96            | 1.50    | 0.41      | 1.00   | 0.05       | 0.14   | 3.500                                                              | 0.036  | 4.912  | 0.010  | 16.444              | <0.001             |
| Ventral Anterior Insula - Inferior OFC, L     | 0.05            | 0.08    | 0.02      | 0.05   | 0.00       | 0.01   | 3.500                                                              | 0.036  | 4.912  | 0.010  | 16.444              | <0.001             |
| Ventral Anterior Insula - Medial OFC, L       | 15.20           | 31.31   | 2.24      | 2.89   | 8.10       | 25.74  | 1.469                                                              | 0.237  | 1.995  | 0.143  | 12.427              | 0.002              |
| Ventral Anterior Insula - Middle OFC, L       | 56.48           | 40.17   | 116.23    | 32.83  | 103.38     | 38.27  | 14.425                                                             | <0.001 | 18.533 | 0.000  | 24.251              | <0.001             |
| Ventral Anterior Insula - Rectus, L           | 28.71           | 38.37   | 16.97     | 26.53  | 43.63      | 55.17  | 2.671                                                              | 0.076  | 2.638  | 0.078  | 3.653               | 0.161              |
| Ventral Anterior Insula - Ventral Striatum, L | 314.12          | 206.49  | 520.62    | 116.55 | 556.27     | 24.97  | 9.506                                                              | <0.001 | 22.923 | <0.001 | 24.322              | <0.001             |
| Ventral Anterior Insula - BA10, R             | 48.71           | 19.72   | 41.32     | 26.13  | 31.26      | 26.92  | 2.369                                                              | 0.101  | 3.269  | 0.044  | 5.893               | 0.053              |
| Ventral Anterior Insula - BLA, R              | 0.40            | 0.73    | 0.07      | 0.17   | 0.01       | 0.05   | 3.121                                                              | 0.050  | 6.052  | 0.004  | 14.178              | 0.001              |
| Ventral Anterior Insula - CNA, R              | 3.30            | 8.17    | 0.30      | 1.07   | 0.02       | 0.07   | 1.766                                                              | 0.179  | 3.711  | 0.029  | 23.781              | <0.001             |
| Ventral Anterior Insula - Inferior OFC, R     | 78.97           | 0.00    | 78.97     | 0.00   | 78.97      | 0.00   | 100% of connectivity probability between regions and across groups |        |        |        |                     |                    |
| Ventral Anterior Insula - Medial OFC, R       | 37.33           | 53.04   | 48.78     | 60.10  | 42.10      | 65.32  | 0.272                                                              | 0.763  | 0.242  | 0.786  | 1.037               | 0.596              |
| Ventral Anterior Insula - Middle OFC, R       | 117.45          | 35.65   | 112.36    | 45.03  | 116.33     | 45.41  | 0.243                                                              | 0.785  | 0.104  | 0.902  | 1.060               | 0.589              |
| Ventral Anterior Insula - Rectus, R           | 62.43           | 49.62   | 71.47     | 51.55  | 86.01      | 54.05  | 0.976                                                              | 0.382  | 1.344  | 0.267  | 3.016               | 0.221              |
| Ventral Anterior Insula - Ventral Striatum, R | 571.32          | 83.02   | 592.98    | 51.51  | 606.57     | 49.91  | 0.678                                                              | 0.511  | 2.005  | 0.142  | 0.391               | 0.142              |
| Medial OFC - BA10, L                          | 30.29           | 0.00    | 30.29     | 0.00   | 30.29      | 0.00   | 100% of connectivity probability between regions and across groups |        |        |        |                     |                    |
| Medial OFC - Hypothalamus, L                  | 75.87           | 108.04  | 8.41      | 39.22  | 13.69      | 59.97  | 3.373                                                              | 0.040  | 6.470  | 0.003  | 29.385              | <0.001             |
| Medial OFC - Ventral Striatum, L              | 112.75          | 70.07   | 93.65     | 85.30  | 120.38     | 61.76  | 0.890                                                              | 0.415  | 0.908  | 0.408  | 1.607               | 0.448              |
| Medial OFC - BA10, R                          | 36.75           | 0.00    | 36.75     | 0.00   | 36.75      | 0.00   | 100% of connectivity probability between regions and across groups |        |        |        |                     |                    |
| Medial OFC - Hypothalamus, R                  | 16.88           | 21.33   | 3.82      | 10.83  | 81.89      | 322.12 | 1.032                                                              | 0.362  | 1.309  | 0.276  | 9.335               | 0.009              |
| Medial OFC - Ventral Striatum, R              | 87.45           | 95.24   | 149.96    | 108.23 | 159.66     | 92.04  | 3.549                                                              | 0.034  | 4.050  | 0.021  | 9.205               | 0.010              |
| Middle OFC - BA10, L                          | 25.55           | 0.00    | 25.55     | 0.00   | 25.55      | 0.00   | 100% of connectivity probability between regions and across groups |        |        |        |                     |                    |
| Middle OFC - Hypothalamus, L                  | 112.31          | 137.50  | 13.15     | 33.04  | 27.41      | 61.69  | 4.900                                                              | 0.010  | 9.316  | <0.001 | 24.450              | <0.001             |
| Middle OFC - Ventral Striatum, L              | 130.10          | 50.88   | 141.63    | 67.83  | 177.60     | 41.36  | 2.522                                                              | 0.088  | 5.217  | 0.008  | 15.873              | <0.001             |
| Middle OFC - BA10, R                          | 29.75           | 0.00    | 28.61     | 5.84   | 29.75      | 0.00   | 1.787                                                              | 0.175  | 0.980  | 0.380  | 1.962               |                    |
